# Supplementary material for: Moderate Folic Acid Supplementation in Pregnant Mice Results in Altered Sex-Specific Gene Expression in Brain of Young Mice and Embryos
Source: MDPI journal article supplement (doi:10.3390/nu14051051), 2022-03-02
Supplement: s1 [file s1]

different sense oligonucleotides for TVN-PAT assays confirmed the location of the main polyadenylation site for genes that were assessed by ePAT. No amplicon was observed when reverse-transcriptase was omitted. (D) cDNA species missing a significant poly(A) tail are not detected by ePAT. Degradation of poly(A) tails may result in decreased intensity of bands as well as appearance of smears.

## References

1. Proudfoot, N.J. Ending the message: poly(A) signals then and now. *Genes Dev* **2011**, *25*, 1770-1782, doi:10.1101/gad.17268411.
2. Sheets, M.D.; Ogg, S.C.; Wickens, M.P. Point mutations in AAUAAA and the poly (A) addition site: effects on the accuracy and efficiency of cleavage and polyadenylation in vitro. *Nucleic Acids Res* **1990**, *18*, 5799-5805, doi:10.1093/nar/18.19.5799.
3. Beilharz, T.H.; Preiss, T. Transcriptome-wide measurement of mRNA polyadenylation state. *Methods* **2009**, *48*, 294-300, doi:10.1016/j.ymeth.2009.02.003.

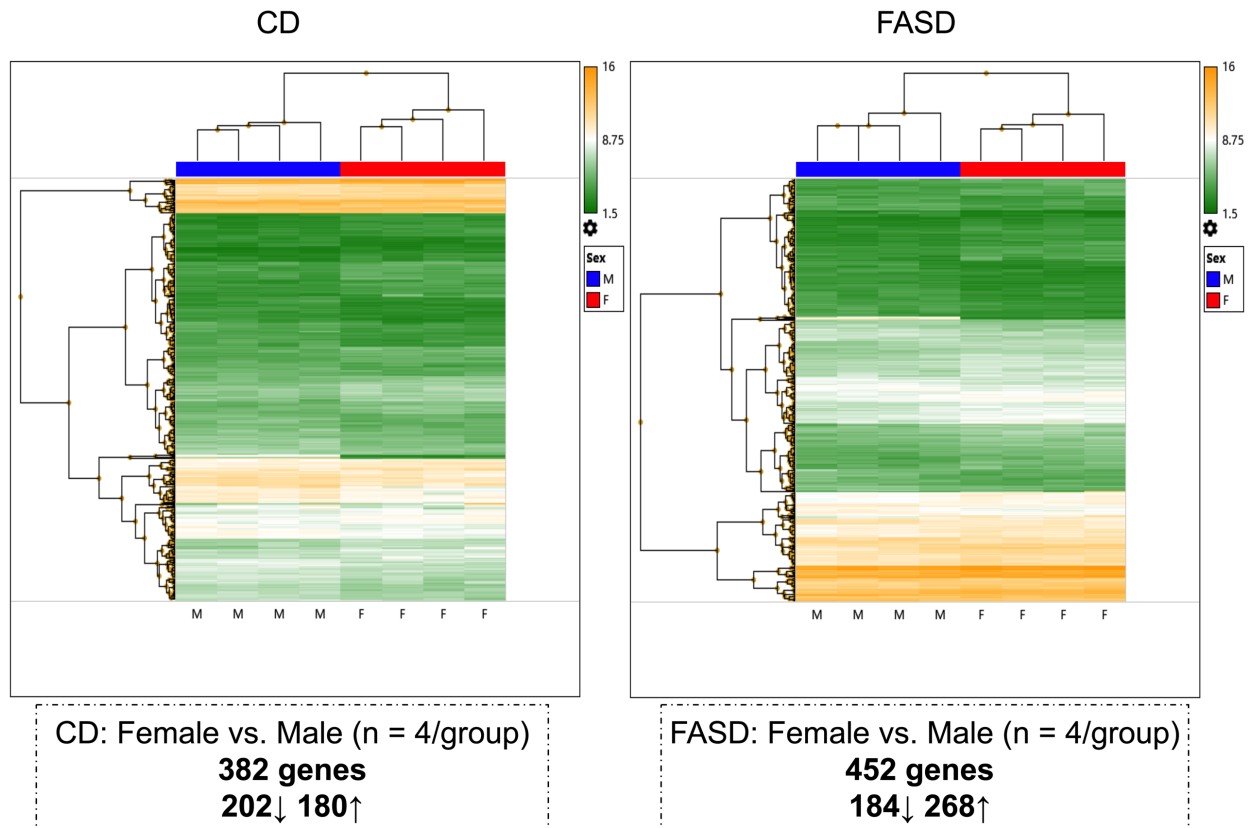

**Figure S2. Hierarchical clustering showing distinct sex expression pattern in P30 cortex.** 382 genes (202 down-regulated, 180 up-regulated) were differentially expressed in CD females compared to CD males, and 452 genes (184 down-regulated, 268 up-regulated) were differentially expressed in FASD females compared to FASD males.

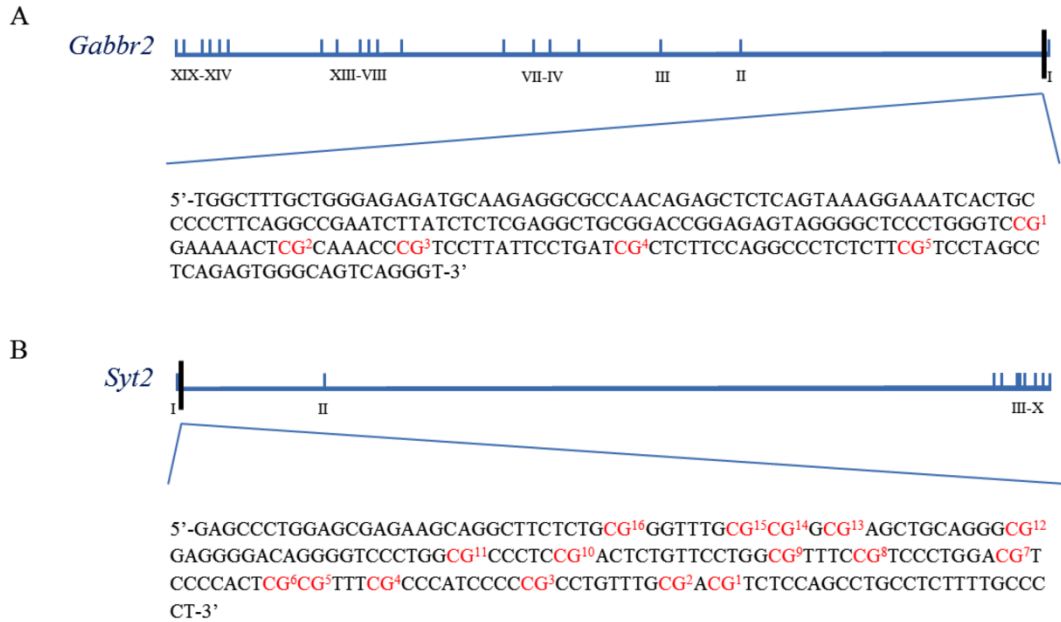

**Figure S3. Schematic representation of CpGs analyzed by quantitative bisulfite pyrosequencing.** (A) CpGs 1 to 5 of *Gabbr2* are included between positions 46990041-46990248 of genome assembly GRCm39 (mm39) from Genome Reference Consortium. Numbering of CpGs was arbitrarily assigned and matches the numbering in Figure 3A. (B) CpGs 1 to 16 are included between positions 134574702-134574775 of genome assembly GRCm39 (mm39) from Genome Reference Consortium. Numbering of CpGs was arbitrarily assigned and matches the numbering in Figure 3B and Figure 10.

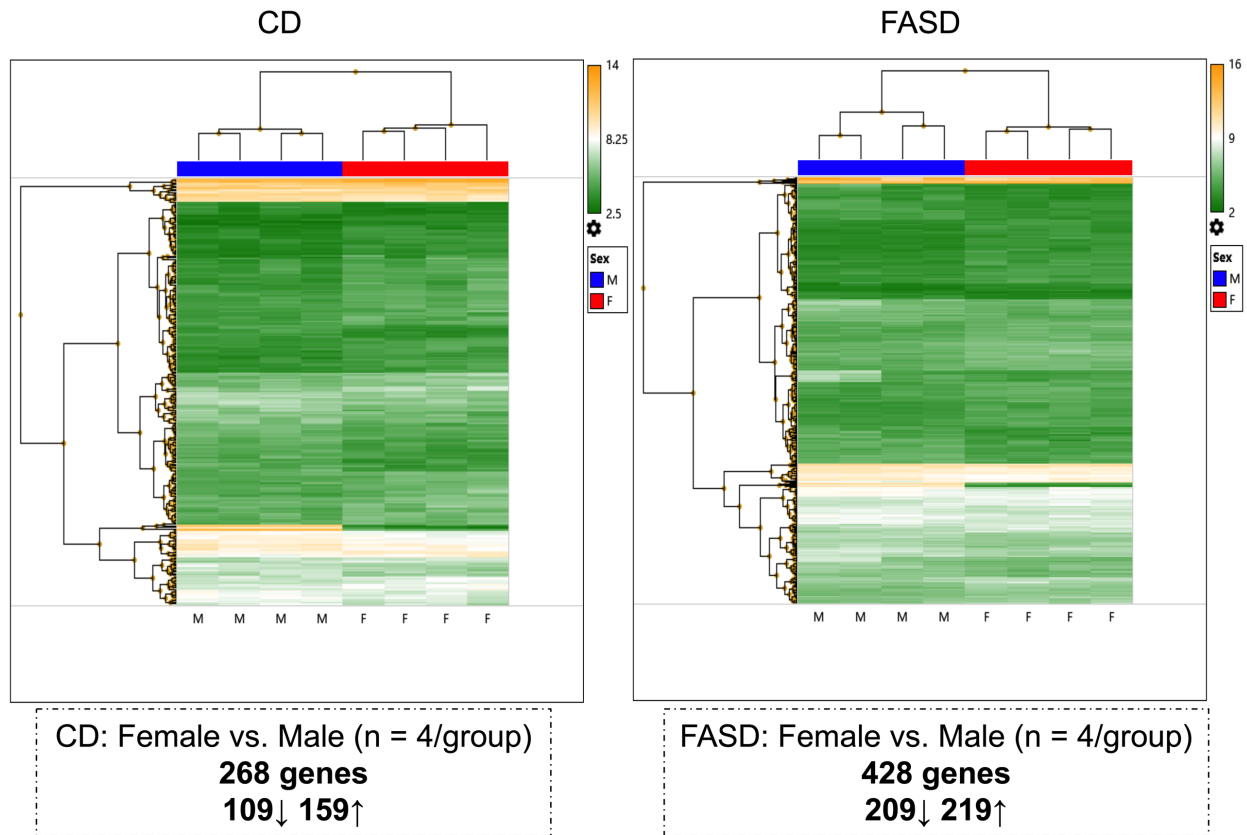

**Figure S4. Hierarchical clustering showing distinct sex expression pattern in E17.5 cerebrum.** 268 genes (109 down-regulated, 159 up-regulated) were differentially expressed in CD females compared to CD males, and 428 genes (209 down-regulated, 219 up-regulated) were differentially expressed in FASD females compared to FASD males.

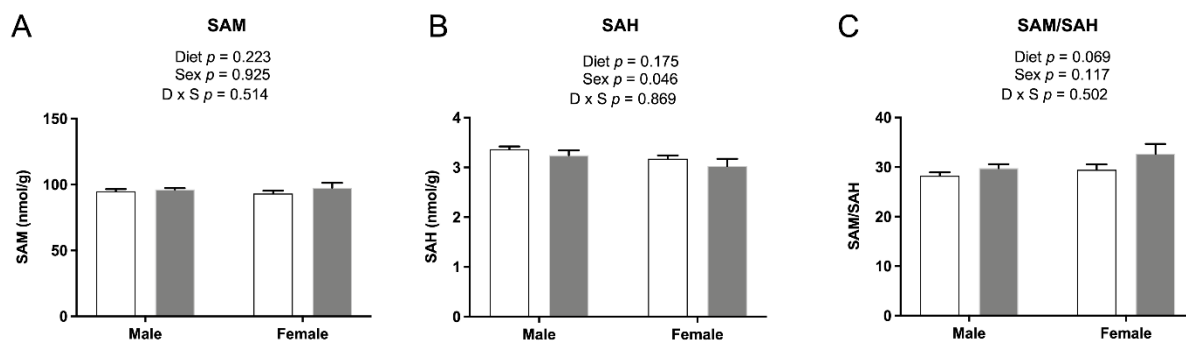

**Figure S5. Concentration of methyl metabolites in E17.5 cerebrum.** (A) SAM, (B) SAH, (C) SAM/SAH ratio. Values are means  $\pm$  SEM of 7-8 per group.  $p$  values from 2-factor ANOVA are indicated at the top of each graph. CD: control diet, FASD: folic acid supplemented diet, D: diet, S: sex, D x S: diet x sex interaction. SAM, S-adenosylmethionine, SAH, S-adenosylhomocysteine.

**Table S1. Composition of Control Diet (CD) and Folic Acid Supplemented Diet (FASD).**

| <b>Diet Composition</b>                       | <b>CD (TD.01369)<br/>(2mg/kg Folic Acid)<br/>(g/kg)</b> | <b>FASD (TD.08278)<br/>(10mg/kg Folic<br/>Acid)<br/>(g/kg)</b> |
|-----------------------------------------------|---------------------------------------------------------|----------------------------------------------------------------|
| L-Alanine                                     | 3.5                                                     | 3.5                                                            |
| L-Arginine HCl                                | 12.1                                                    | 12.1                                                           |
| L-Asparagine                                  | 6.0                                                     | 6.0                                                            |
| L-Aspartic Acid                               | 3.5                                                     | 3.5                                                            |
| L-Cystine                                     | 3.5                                                     | 3.5                                                            |
| L-Glutamic Acid                               | 40.0                                                    | 40.0                                                           |
| Glycine                                       | 23.3                                                    | 23.3                                                           |
| L-Histidine HCl, monohydrate                  | 4.5                                                     | 4.5                                                            |
| L-Isoleucine                                  | 8.2                                                     | 8.2                                                            |
| L-Leucine                                     | 11.1                                                    | 11.1                                                           |
| L-Lysine HCl                                  | 18.0                                                    | 18.0                                                           |
| L-Methionine                                  | 3.3                                                     | 3.3                                                            |
| L-Phenylalanine                               | 7.5                                                     | 7.5                                                            |
| L-Proline                                     | 3.5                                                     | 3.5                                                            |
| L-Serine                                      | 3.5                                                     | 3.5                                                            |
| L-Threonine                                   | 8.2                                                     | 8.2                                                            |
| L-Tryptophan                                  | 1.8                                                     | 1.8                                                            |
| L-Tyrosine                                    | 5.0                                                     | 5.0                                                            |
| L-Valine                                      | 8.2                                                     | 8.2                                                            |
| Sucrose                                       | 349.53                                                  | 349.422                                                        |
| Corn Starch                                   | 150.0                                                   | 150.0                                                          |
| Maltodextrin                                  | 150.0                                                   | 150.0                                                          |
| Soybean Oil                                   | 80.0                                                    | 80.0                                                           |
| Cellulose                                     | 30.0                                                    | 30.0                                                           |
| Mineral Mix, AIN-93-M-MX                      | 35.0                                                    | 35.0                                                           |
| Calcium Phosphate, monobasic,<br>monohydrate  | 8.2                                                     | 8.2                                                            |
| Succinylsulfathiazole                         | 10.0                                                    | 10.0                                                           |
| Vitamin Mix, AIN-93-VX                        | 10.0                                                    | 10.0                                                           |
| Choline Bitartrate                            | 2.5                                                     | 2.5                                                            |
| Vitamin K, menadione sodium<br>bisulfite      | 0.05                                                    | 0.05                                                           |
| tert-Butylhydroquinone<br>(TBHQ), antioxidant | 0.02                                                    | 0.02                                                           |
| Folic Acid                                    | -                                                       | 0.008                                                          |
| Red food color                                | -                                                       | 0.1                                                            |

**Table S2. Oligonucleotide primer sets used for qRT-PCR analysis (including normalizer genes) and PCR conditions.**

| Gene           | Sense Primer             | Antisense primer        | Amplicon size (bp) | Annealing temperature (°C) | Primer molarity (μM) |
|----------------|--------------------------|-------------------------|--------------------|----------------------------|----------------------|
| <i>Actb</i>    | CTGACGGCCAGGTCATCACTA    | TAGTTTCATGGATGCCACAGGAT | 105                | 60                         | 0.4                  |
| <i>Angpt2</i>  | AGAGTCCAACCTACAGGATTCACC | GACCACATGCGTCAAACCAC    | 170                | 60                         | 0.6                  |
| <i>Arnt</i>    | TGCACAGGCTACATCAAGGC     | GGGAGAACTAGTTACCTGCAGCC | 126                | 60                         | 0.6                  |
| <i>B2m</i>     | ATGCTATCCAGAAAACCCCTCAA  | GCGGGTGGAAGTGTGTACG     | 102                | 60                         | 0.4                  |
| <i>Chrm1</i>   | GGTCCCATGGAAACCCTGAAT    | GCCAGCAGCCTCATTCAATC    | 77                 | 60                         | 0.4                  |
| <i>Colla1</i>  | CTGACGCATGGCCAAGAAGA     | CCCTTGGGTCCCTCGACTC     | 260                | 60                         | 0.6                  |
| <i>Col4a2</i>  | CGTGACAAATACCGGGGTGA     | GTCCGTAAAAACCGAGCCCT    | 178                | 60                         | 0.6                  |
| <i>Eef2</i>    | TGTCAGTCATCGCCCATGTG     | CATCCTTGCGAGTGTCACTGA   | 123                | 60                         | 0.6                  |
| <i>Esys1</i>   | CTACCCAGGGGCATTATCCG     | GGGATCCGATTTGCCCTCAA    | 99                 | 60                         | 0.4                  |
| <i>Gabbr2</i>  | CTTCTTCGGAGTCACGGGTC     | GTTGTACTCGCCGACCTTCA    | 109                | 60                         | 0.4                  |
| <i>Gabrb1</i>  | TCTTTTCCCGTGATGGTTGC     | CGGGGGCCCTCCAAAG        | 141                | 60                         | 0.6                  |
| <i>Gabrd</i>   | TCAAATCGGCTGGCCAGTTCCC   | GCACGGCTGCCTGGCTAATCC   | 147                | 60                         | 0.4                  |
| <i>Gapdh</i>   | CAGGAGCGAGACCCCACTAACAT  | AAGACACCAGTAGACTCCACGAC | 74                 | 62                         | 0.4                  |
| <i>Grina</i>   | CCCTACCCTCAAGGAGGCTAC    | CTGGCGAATGTTCTTGTTCC    | 192                | 60                         | 0.6                  |
| <i>Htr1a</i>   | CAACAACACCACAACGTCCC     | GCTGAAGGTCACGTTGGAGA    | 76                 | 60                         | 0.4                  |
| <i>Igf1</i>    | CTGGACCAGAGACCCTTTGC     | CTCCGAATGCTGGAGCCATA    | 112                | 60                         | 0.4                  |
| <i>Nono</i>    | AAAGCAGGCGAAGTTTTTCATTC  | ATTTCCGCTAGGGTTCGTGTT   | 77                 | 60                         | 0.6                  |
| <i>Nrp1</i>    | CAGTGGCACAGGTGATGACT     | CCGTATGTCGGGAAGTCTGA    | 108                | 60                         | 0.6                  |
| <i>Ogt</i>     | TCATCACTTTGAAAAGGCTGTC   | AAGGCACGAAGATAAGCTGC    | 123                | 60                         | 0.6                  |
| <i>Parn</i>    | CCCATGCACTGGGTTCCAA      | TCCTGCTCTCTCCTTTTGCG    | 156                | 60                         | 0.6                  |
| <i>Rnh1</i>    | CCAGATACAGTGCTGCGTGA     | AGGCTGCTGCAACCACTATT    | 68                 | 60                         | 0.6                  |
| <i>Sdha</i>    | GCTGTGGCCCTGAGAAAGATC    | ATCATGGCCGTCTCTGAAATTC  | 100                | 60                         | 0.4                  |
| <i>Sfrp1</i>   | TACCACGGAAGCCTCTAAGC     | GGCCTCTGACTCAACTCGT     | 73                 | 60                         | 0.6                  |
| <i>Sfrp4</i>   | AGCCCTGATCGGTGCAAGT      | ATTGCAACCACTCCTCTGGAC   | 117                | 60                         | 0.6                  |
| <i>Slc32a1</i> | CCATTCAGGGCATGTTTCGTG    | GAGGAACAACCCAGGTAGC     | 71                 | 60                         | 0.6                  |
| <i>Syt2</i>    | GGCGGCGAGATGTGATACT      | GGGTGTCTATGATGGCATCAA   | 69                 | 60                         | 0.4                  |
| <i>Tbp</i>     | ACCGTGAATCTTGGCTGTAAAC   | GCAGCAAATCGCTTGGGATTA   | 86                 | 60                         | 0.6                  |
| <i>Tfrc</i>    | GTTTCTGCCAGCCCCCTTATTAT  | GCAAGGAAAGGATATGCAGCA   | 152                | 60                         | 0.6                  |
| <i>Tph2</i>    | GCTACCTGAGCCCAAGAGAC     | GCATGTATCTGGTTCCGGGG    | 113                | 60                         | 0.4                  |
| <i>Tubal1</i>  | CCAGGGCTTCTTGGTTTTC      | CTACCATGAAGGCACAATC     | 218                | 60                         | 0.6                  |



|                     |                        |                        |     |    |     |
|---------------------|------------------------|------------------------|-----|----|-----|
| <i>Ubc</i>          | AGCCCAGTGTTACCACCAAG   | ACCCAAGAACAAGCACAAGG   | 97  | 60 | 0.6 |
| <i>Vegfa(120aa)</i> | CTTCCTACAGCACAGCAGATG  | TGGCTTGTCACATTTTCTGGC  | 73  | 60 | 0.6 |
| <i>Vegfa(164aa)</i> | AGCACAGCAGATGTGAATGCAG | AGGCTCACAGTGATTTTCTGGC | 65  | 60 | 0.6 |
| <i>Ywhaz</i>        | TGCTGGTGATGACAAGAAAGGA | TGAGGGCCAGACCCAGTCT    | 119 | 60 | 0.4 |

**Table S3. Full gene names.**

| <b>Abbreviation</b> | <b>Full name</b>                                                            |
|---------------------|-----------------------------------------------------------------------------|
| <i>Actb</i>         | actin beta                                                                  |
| <i>Arnt</i>         | aryl hydrocarbon receptor nuclear translocator                              |
| <i>B2m</i>          | beta-2-microglobulin                                                        |
| <i>Chrm1</i>        | cholinergic receptor muscarinic 1                                           |
| <i>Colla1</i>       | collagen type I alpha 1                                                     |
| <i>Col4a2</i>       | collagen type IV alpha 2                                                    |
| <i>Eef2</i>         | eukaryotic translation elongation factor 2                                  |
| <i>Esyt1</i>        | extended synaptotagmin 1                                                    |
| <i>Gabbr2</i>       | gamma-aminobutyric acid (GABA) B receptor 2                                 |
| <i>Gabbr1</i>       | gamma-aminobutyric acid type A receptor subunit beta1                       |
| <i>Gabrd</i>        | gamma-aminobutyric acid type A receptor delta subunit                       |
| <i>Gapdh</i>        | glyceraldehyde-3-phosphate dehydrogenase                                    |
| <i>Grina</i>        | glutamate ionotropic receptor NMDA type subunit associated protein 1        |
| <i>Htr1a</i>        | 5-hydroxytryptamine receptor 1A                                             |
| <i>Igf1</i>         | insulin like growth factor 1                                                |
| <i>Nono</i>         | non-POU domain containing octamer binding                                   |
| <i>Nrp1</i>         | neuropilin 1                                                                |
| <i>Ogt</i>          | O-linked N-acetylglucosamine (GlcNAc) transferase                           |
| <i>Parn</i>         | poly(A)-specific ribonuclease                                               |
| <i>Rnh1</i>         | ribonuclease inhibitor 1                                                    |
| <i>Sdha</i>         | succinate dehydrogenase complex flavoprotein subunit A                      |
| <i>Sfrp1</i>        | secreted frizzled-related protein 1                                         |
| <i>Sfrp4</i>        | secreted frizzled-related protein 4                                         |
| <i>Slc32a1</i>      | solute carrier family 32 member 1                                           |
| <i>Syt2</i>         | synaptotagmin 2                                                             |
| <i>Tbp</i>          | TATA-box binding protein                                                    |
| <i>Tfrc</i>         | transferrin receptor                                                        |
| <i>Tph2</i>         | tryptophan hydroxylase 2                                                    |
| <i>Tuba1a</i>       | tubulin alpha 1A                                                            |
| <i>Ubc</i>          | ubiquitin C                                                                 |
| <i>Vegf</i>         | vascular endothelial growth factor                                          |
| <i>Ywhaz</i>        | tyrosine 3-monooxygenase/tryptophan 5-monooxygenase activation protein zeta |

**Table S4. Oligonucleotide combinations used for quantitative bisulfite pyrosequencing methylation analysis of *Gabbr2* and *Syt2* genes in the genomic segments described in Figure S3, as well as for *Chrm1*, *Igf1*, *Sfrp1* and *Sfrp4* genes.**

| Oligonucleotide sequence <sup>a</sup> and orientation <sup>b</sup> |        | Amplified segment                   | Amplicon size (bp) |
|--------------------------------------------------------------------|--------|-------------------------------------|--------------------|
| TGGTTTTGTTGGGAGAGATGTAAGA                                          | (S)    | Mouse <i>Gabbr2</i> promoter region | 208                |
| 5'Biot- ACCCTAACTACCCACTCTAAACTA                                   | (A)    |                                     |                    |
| GAGGATAGGAGAGTAGGGGT                                               | (SEQ1) |                                     |                    |
| TTTTTGGGTAGGAAAAATT                                                | (SEQ2) |                                     |                    |
| 5'Biot- AAACCCTAAAACCAAAAACAACTTCTCTAC                             | (S)    | Mouse <i>Syt2</i> promoter region   | 183                |
| AGGGGTAAAAGAGGTAGGTTG                                              | (A)    |                                     |                    |
| CCACAATATTTATTTAAACAATTC                                           | (SEQ1) |                                     |                    |
| AAATAGGAGGGGGATGGG                                                 | (SEQ2) |                                     |                    |
| GTTTAGGGAAGGAAAAGTTAGGAATAGAGT                                     | (SEQ3) |                                     |                    |
| TGTTTTTTTTTTTTGTTGTGAGGGAGTTAAA                                    | (S)    | Mouse <i>Chrm1</i> promoter region  | 107                |
| 5'-biot-AAACCAACCCTCTAAATCTAATCCAAATTAA                            | (A)    |                                     |                    |
| TTTGTTTGAAAATGATATATTGG                                            | (SEQ1) |                                     |                    |
| ATTGGGTAAGTGGTTGGTAGTAT                                            | (S)    | Mouse <i>Igf1</i> promoter region   | 174                |
| 5'biot-ACCTTCTTTCATAATTCACCTTCTTATCT                               | (A)    |                                     |                    |
| GTTGGTAGTATGGTTTAAG                                                | (SEQ1) |                                     |                    |
| GGAGTTTTGATTTTTTGTGTA                                              | (SEQ2) |                                     |                    |
| ATGGGTAGGTTGAATTTAGGG                                              | (S)    | Mouse <i>Sfrp1</i> promoter region  | 161                |
| 5'biot-CTAATACCCACATAATCAATACTCTTCT                                | (A)    |                                     |                    |
| ATTTAGGGAGTTTTTTTAAATT                                             | (SEQ1) |                                     |                    |
| TGTTTGTGGTTGTGTTTGTAGGTGA                                          | (SEQ2) |                                     |                    |
| GTAGAATTATGGTTTTTGGTTGTGG                                          | (S)    | Mouse <i>Sfrp4</i> promoter region  | 137                |
| 5'biot-TCCCCTAACCTAACTCAACAACCTTA                                  | (A)    |                                     |                    |
| TGGAGAGGTAGAGATGATGT                                               | (SEQ1) |                                     |                    |
| TGTAGGAGAGGTTGGGGGTG                                               | (SEQ2) |                                     |                    |

<sup>a</sup> 5'Biot- designates a 5'-biotinylated oligonucleotide.

<sup>b</sup> (S), sense PCR primer; (A), antisense PCR primer; (SEQ1), (SEQ2) and (SEQ3), sequencing primer, same polarity as the non-biotinylated PCR primer.

**Table S5. Oligonucleotide primer sets used for ePAT analysis of polyadenylated mRNAs.**

| Oligonucleotide <sup>(a)</sup> | Sequence                          | Orientation <sup>(b)</sup> |
|--------------------------------|-----------------------------------|----------------------------|
| PAT anchor primer              | GCGAGCTCCGCGGCCGCGTTTTTTTTTTTTT   | (A)                        |
| TVN anchor primer              | GCGAGCTCCGCGGCCGCGTTTTTTTTTTTTTVN | (A)                        |
| <i>Eef2</i> - 141 bp           | GTGGGGTAAGTGCCTCCAG               | (S)                        |
| <i>Eef2</i> - 169 bp           | GCCAAGTGGAGTTCCCCCAG              | (S)                        |
| <i>Eef2</i> - 172 bp           | ATGGCCAAGTGGAGTTCCC               | (S)                        |
| <i>Eef2</i> - 176 bp           | GTCCATGGCCAAGTGGAGT               | (S)                        |
| <i>Nono</i> - 113 bp           | CAGATACCTTCAGTTTGGAAAGTT          | (S)                        |
| <i>Nono</i> - 123 bp           | TGAATTGTTCCAGATACCTTCAGT          | (S)                        |
| <i>Nono</i> - 159 bp           | TAGGTAGCTACGCTGTGCAT              | (S)                        |
| <i>Tfrc</i> - 125 bp           | TGTCTTTGCTGAAATGCCCTT             | (S)                        |
| <i>Tfrc</i> - 126 bp           | CTGTCTTTGCTGAAATGCCCT             | (S)                        |
| <i>Tfrc</i> - 127 bp           | ACTGTCTTTGCTGAAATGCCC             | (S)                        |
| <i>Tfrc</i> - 139 bp           | TGCCAACCTATACTGTCTTTGCT           | (S)                        |

<sup>a</sup> For gene-specific sense primers, the bp number indicates the expected size for the TVN amplicon.

<sup>b</sup> (S), sense; (A), antisense.

**Table S6. 15 genes showing a diet effect for both sexes in P30 pups**

| <b>ID</b>         | <b>Gene Symbol</b>   | <b>Description</b>                                                      | <b>Chromosome</b> | <b>Group</b>     |
|-------------------|----------------------|-------------------------------------------------------------------------|-------------------|------------------|
| TC0100000637.mm.2 | <i>Plcd4</i>         | phospholipase C, delta 4                                                | chr1              | Multiple_Complex |
| TC0100000640.mm.2 | <i>Tll4</i>          | tubulin tyrosine ligase-like family, member 4                           | chr1              | Multiple_Complex |
| TC0200001779.mm.2 | <i>Rtf1</i>          | Rtf1, Paf1/RNA polymerase II complex component, homolog (S. cerevisiae) | chr2              | Multiple_Complex |
| TC0200003177.mm.2 | <i>C330006A16Rik</i> | RIKEN cDNA C330006A16 gene                                              | chr2              | Multiple_Complex |
| TC0300000841.mm.2 | <i>Gm4858</i>        | predicted gene 4858                                                     | chr3              | Coding           |
| TC0300001362.mm.2 | <i>Tacr3</i>         | tachykinin receptor 3                                                   | chr3              | Coding           |
| TC0600000409.mm.2 | <i>Wee2</i>          | WEE1 homolog 2 (S. pombe)                                               | chr6              | Coding           |
| TC0600002743.mm.2 | <i>Trh</i>           | thyrotropin releasing hormone                                           | chr6              | Coding           |
| TC0700001409.mm.2 | <i>Ucp2</i>          | uncoupling protein 2 (mitochondrial, proton carrier)                    | chr7              | Multiple_Complex |
| TC0X00001955.mm.2 | <i>Klhl13</i>        | kelch-like 13                                                           | chrX              | Multiple_Complex |
| TC0X00002274.mm.2 | <i>Gpr101</i>        | G protein-coupled receptor 101                                          | chrX              | Multiple_Complex |
| TC1200001912.mm.2 | <i>Six1</i>          | sine oculis-related homeobox 1                                          | chr12             | Multiple_Complex |
| TC1500000346.mm.2 | <i>Trhr</i>          | thyrotropin releasing hormone receptor                                  | chr15             | Coding           |
| TC1600000508.mm.2 | <i>Gm5483</i>        | predicted gene 5483                                                     | chr16             | Multiple_Complex |
| TC1600000741.mm.2 | <i>Senp7</i>         | SUMO1/sentrin specific peptidase 7                                      | chr16             | Multiple_Complex |

**Table S7. 23 genes showing sex differences for both diets in P30 pups.**

| <b>ID</b>         | <b>Gene Symbol</b> | <b>Description</b>                                                              | <b>Chromosome</b> | <b>Group</b>     |
|-------------------|--------------------|---------------------------------------------------------------------------------|-------------------|------------------|
| TC0100000637.mm.2 | <i>Plcd4</i>       | phospholipase C, delta 4                                                        | chr1              | Multiple_Complex |
| TC0100000640.mm.2 | <i>Ttl4</i>        | tubulin tyrosine ligase-like family, member 4                                   | chr1              | Multiple_Complex |
| TC0200001340.mm.2 | <i>Olfrl261</i>    | olfactory receptor 1261                                                         | chr2              | Coding           |
| TC0400001715.mm.2 | <i>Eif4g3</i>      | eukaryotic translation initiation factor 4 gamma, 3                             | chr4              | Multiple_Complex |
| TC0400004191.mm.2 | <i>Slc6a9</i>      | solute carrier family 6 (neurotransmitter transporter, glycine), member 9       | chr4              | Multiple_Complex |
| TC0500001205.mm.2 | <i>Wscd2</i>       | WSC domain containing 2                                                         | chr5              | Multiple_Complex |
| TC0600002714.mm.2 | <i>Cfap100</i>     | cilia and flagella associated protein 100                                       | chr6              | Multiple_Complex |
| TC0700001409.mm.2 | <i>Ucp2</i>        | uncoupling protein 2 (mitochondrial, proton carrier)                            | chr7              | Multiple_Complex |
| TC0700002178.mm.2 | <i>Sbk2</i>        | SH3-binding domain kinase family, member 2                                      | chr7              | Multiple_Complex |
| TC0700002373.mm.2 | <i>Sult2a4</i>     | sulfotransferase family 2A, dehydroepiandrosterone (DHEA)-preferring, member 4  | chr7              | Coding           |
| TC0X00000190.mm.2 | <i>Kdm6a</i>       | lysine (K)-specific demethylase 6A                                              | chrX              | Multiple_Complex |
| TC0X00002643.mm.2 | <i>Eif2s3x</i>     | eukaryotic translation initiation factor 2, subunit 3, structural gene X-linked | chrX              | Multiple_Complex |
| TC0Y00000005.mm.2 | <i>Kdm5d</i>       | lysine (K)-specific demethylase 5D                                              | chrY              | Multiple_Complex |
| TC0Y00000006.mm.2 | <i>Eif2s3y</i>     | eukaryotic translation initiation factor 2, subunit 3, structural gene Y-linked | chrY              | Multiple_Complex |
| TC0Y00000066.mm.2 | <i>Gm21768</i>     | predicted gene, 21768                                                           | chrY              | Coding           |
| TC0Y00000233.mm.2 | <i>Uty</i>         | ubiquitously transcribed tetratricopeptide repeat gene, Y chromosome            | chrY              | Multiple_Complex |
| TC0Y00000235.mm.2 | <i>Ddx3y</i>       | DEAD (Asp-Glu-Ala-Asp) box polypeptide 3, Y-linked                              | chrY              | Multiple_Complex |
| TC1100002004.mm.2 | <i>Endov</i>       | endonuclease V                                                                  | chr11             | Multiple_Complex |
| TC1200001912.mm.2 | <i>Six1</i>        | sine oculis-related homeobox 1                                                  | chr12             | Multiple_Complex |
| TC1300000020.mm.2 | <i>Akr1c19</i>     | aldo-keto reductase family 1, member C19                                        | chr13             | Multiple_Complex |

|                   |               |                                                                                                  |       |                  |
|-------------------|---------------|--------------------------------------------------------------------------------------------------|-------|------------------|
| TC1600001788.mm.2 | <i>Olf190</i> | olfactory receptor 190                                                                           | chr16 | Coding           |
| TC1900000467.mm.2 | <i>Papss2</i> | 3-phosphoadenosine 5-phosphosulfate synthase 2; 3'-phosphoadenosine 5'-phosphosulfate synthase 2 | chr19 | Multiple_Complex |
| TC1900000928.mm.2 | <i>Gm960</i>  | predicted gene 960                                                                               | chr19 | Coding           |

**Table S8. Five genes showing a diet effect for both sexes in E17.5 embryos.**

| <b>ID</b>         | <b>Gene Symbol</b> | <b>Description</b>                                                                    | <b>Chromosome</b> | <b>Group</b>     |
|-------------------|--------------------|---------------------------------------------------------------------------------------|-------------------|------------------|
| TC0200001276.mm.2 | <i>Olfrl112</i>    | olfactory receptor 1112                                                               | chr2              | Coding           |
| TC0400002381.mm.2 | <i>Spacal</i>      | sperm acrosome associated 1                                                           | chr4              | Coding           |
| TC0X00002031.mm.2 | <i>Gm2964</i>      | predicted gene 2964<br>[Source:MGI<br>Symbol;Acc:MGI:3781142];<br>predicted gene 2964 | chrX              | Coding           |
| TC0Y00000067.mm.2 | <i>Gm20840</i>     | predicted gene, 20840                                                                 | chrY              | Coding           |
| TC1100001293.mm.2 | <i>Bcas3</i>       | breast carcinoma amplified<br>sequence 3                                              | chr11             | Multiple_Complex |



**Table S9. Three genes showing a diet effect for both P30 and E17.5 males.**

| <b>ID</b>         | <b>Gene Symbol</b> | <b>Description</b>                                            | <b>Chromosome</b> | <b>Group</b>     |
|-------------------|--------------------|---------------------------------------------------------------|-------------------|------------------|
| TC0X00002805.mm.2 | <i>Magee2</i>      | melanoma antigen, family E, 2                                 | chrX              | Coding           |
| TC1000003019.mm.2 | <i>Irak3</i>       | interleukin-1 receptor-associated kinase 3                    | chr10             | Multiple_Complex |
| TC1100001848.mm.2 | <i>Kcnj16</i>      | potassium inwardly-rectifying channel, subfamily J, member 16 | chr11             | Coding           |

**Table S10. 12 genes showing a diet effect in both P30 and E17.5 females.**

| <b>ID</b>                   | <b>Gene Symbol</b>        | <b>Description</b>                                                     | <b>Chromosome</b> | <b>Group</b>     |
|-----------------------------|---------------------------|------------------------------------------------------------------------|-------------------|------------------|
| TC0200003300.mm.2           | <i>Dnm1</i>               | dynamain 1                                                             | chr2              | Multiple_Complex |
| TC0200003747.mm.2           | <i>Gm11084</i>            | predicted gene 11084<br>[Source:MGI<br>Symbol;Acc:MGI:377<br>9315]     | chr2              | Coding           |
| TC0400000982.mm.2           | <i>Inadl</i>              | InaD-like<br>(Drosophila)                                              | chr4              | Multiple_Complex |
| TC0500000947.mm.2           | <i>Prdm8</i>              | PR domain containing<br>8                                              | chr5              | Multiple_Complex |
| TC0600000014.mm.2           | <i>Peg10</i>              | paternally expressed<br>10                                             | chr6              | Coding           |
| TC0900000151.mm.2           | <i>Olfir851</i>           | olfactory receptor 851                                                 | chr9              | Coding           |
| TC1100001251.mm.2           | <i>1700020L24R<br/>ik</i> | RIKEN cDNA<br>1700020L24 gene                                          | chr11             | Coding           |
| TC1100001448.mm.2           | <i>Colla1</i>             | collagen, type I, alpha<br>1                                           | chr11             | Multiple_Complex |
| TC1600000288.mm.2           | <i>Eif4g1</i>             | eukaryotic translation<br>initiation factor 4,<br>gamma 1              | chr16             | Multiple_Complex |
| TC1600002145.mm.2           | <i>Dscam</i>              | Down syndrome cell<br>adhesion molecule                                | chr16             | Coding           |
| TC1700000576.mm.2           | <i>LOC1008615<br/>96</i>  | PREDICTED: zinc<br>finger protein 791-like<br>(LOC100861596),<br>mRNA. | chr17             | Coding           |
| TSUnmapped00000005.m<br>m.2 | <i>Amot</i>               | angiomotin                                                             | chrX              | Coding           |

**Table S11. 15 genes showing sex differences for both diets in E17.5 embryos.**

| <b>ID</b>         | <b>Gene Symbol</b> | <b>Description</b>                                                              | <b>Chromosome</b> | <b>Group</b>     |
|-------------------|--------------------|---------------------------------------------------------------------------------|-------------------|------------------|
| TC0200002550.mm.2 | <i>Eya2</i>        | eyes absent 2 homolog (Drosophila)                                              | chr2              | Multiple_Complex |
| TC0500000690.mm.2 | <i>Spata18</i>     | spermatogenesis associated 18                                                   | chr5              | Coding           |
| TC0500003743.mm.2 | <i>Psmg3</i>       | proteasome (prosome, macropain) assembly chaperone 3                            | chr5              | Multiple_Complex |
| TC0600000409.mm.2 | <i>Wee2</i>        | WEE1 homolog 2 (S. pombe)                                                       | chr6              | Coding           |
| TC0600002413.mm.2 | <i>Vmn1r33</i>     | vomer nasal 1 receptor 33                                                       | chr6              | Coding           |
| TC0900000679.mm.2 | <i>Pstpip1</i>     | proline-serine-threonine phosphatase-interacting protein 1                      | chr9              | Multiple_Complex |
| TC0900002044.mm.2 | <i>Slc37a2</i>     | solute carrier family 37 (glycerol-3-phosphate transporter), member 2           | chr9              | Multiple_Complex |
| TC0X00000190.mm.2 | <i>Kdm6a</i>       | lysine (K)-specific demethylase 6A                                              | chrX              | Multiple_Complex |
| TC0Y00000005.mm.2 | <i>Kdm5d</i>       | lysine (K)-specific demethylase 5D                                              | chrY              | Multiple_Complex |
| TC0Y00000006.mm.2 | <i>Eif2s3y</i>     | eukaryotic translation initiation factor 2, subunit 3, structural gene Y-linked | chrY              | Multiple_Complex |
| TC0Y00000233.mm.2 | <i>Uty</i>         | ubiquitously transcribed tetratricopeptide repeat gene, Y chromosome            | chrY              | Multiple_Complex |
| TC0Y00000235.mm.2 | <i>Ddx3y</i>       | DEAD (Asp-Glu-Ala-Asp) box polypeptide 3, Y-linked                              | chrY              | Multiple_Complex |
| TC1100002084.mm.2 | <i>Limk2</i>       | LIM motif-containing protein kinase 2                                           | chr11             | Multiple_Complex |
| TC1200000716.mm.2 | <i>Rps26</i>       | ribosomal protein S26                                                           | chr12             | Multiple_Complex |
| TC1900000026.mm.2 | <i>Cdk2ap2</i>     | CDK2-associated protein 2                                                       | chr19             | Multiple_Complex |
